# Supplementary material
Source: PubMed Central journal article supplement (PMC4529055)
Supplement: Supp_Table1.pdf [file Supp_Table1.pdf]

## Supplementary Data

SUPPLEMENTARY TABLE S1. DESCRIPTION OF THE HEALTH STATUS OF THE PIGLETS BORN FROM SCNT AFTER TREATMENT WITH HDACi, SCRIPTAID, SAHA, AND ISAHA

| <i>Piglet</i> | <i>ID</i> | <i>Treatment</i> | <i>Age of death (days)</i> | <i>Health summary</i>                                                   | <i>Status</i> |
|---------------|-----------|------------------|----------------------------|-------------------------------------------------------------------------|---------------|
| 1             | 11-1      | Scriptaid        | 1                          | Piglet died within hours of birth; no bladder evident upon necropsy     | Died          |
| 2             | 11-2      | Scriptaid        | 19                         | Piglet died after a seizure; enlarged liver upon necropsy               | Died          |
| 3             | 11-3      | Scriptaid        | 0                          | Died 4 hours after birth; abnormal oblong kidneys                       | Died          |
| 4             | 11-4      | Scriptaid        | 5                          | Piglet died during a seizure; had difficulty using rear legs            | Died          |
| 5             | 14-1      | Scriptaid        | 0                          | Piglet died during seizure; umbilical hernia                            | Died          |
| 6             | 14-2      | Scriptaid        | 1                          | Piglet died after vomiting, diarrhea, kyphosis (poor spinal structure)  | Died          |
| 7             | 14-3      | Scriptaid        | 11                         | Piglet died; necropsy revealed evidence of a septicemia                 | Died          |
| 8             | 14-4      | Scriptaid        | 51                         | Piglet lived to day 51; euthanized due to poor leg and spinal structure | Euthanized    |
| 9             | 14-5      | Scriptaid        | 2                          | Piglet lost mobility                                                    | Euthanized    |
| 10            | 26-1      | ISAHA            | 2                          | Piglet had difficulty breathing; contracted tendons on all four legs    | Euthanized    |
| 11            | 26-2      | ISAHA            | 1                          | Piglet appeared healthy; died unexpectedly of unknown cause             | Died          |
| 12            | 26-3      | ISAHA            | 1                          | Lethargic, failure to thrive; liver had a mottled color                 | Died          |
| 13            | 26-4      | ISAHA            | >45                        | Normal                                                                  | Transferred   |
| 14            | 27-1      | ISAHA            | >45                        | Normal                                                                  | Transferred   |
| 15            | 27-2      | ISAHA            | 3                          | Failure to thrive; lungs abnormally red upon necropsy                   | Euthanized    |
| 16            | 27-3      | ISAHA            | 6                          | Piglet died during seizure; heart was thick                             | Died          |
| 17            | 27-4      | ISAHA            | 7                          | Piglet died during seizure; lethargic and no effort to eat              | Died          |
| 18            | 32-1      | ISAHA            | >136                       | Normal                                                                  | Transferred   |
| 19            | 32-2      | ISAHA            | >74                        | Died unexpectedly; necropsy revealed evidence of a septicemia           | Died          |
| 20            | 29-1      | SAHA             | >38                        | Normal                                                                  | Transferred   |
| 21            | 29-2      | SAHA             | 15                         | Piglet appeared healthy; died unexpectedly of unknown cause             | Died          |
| 22            | 30-1      | SAHA             | 1                          | Very stiff muscles in front legs and could not stand                    | Euthanized    |
| 23            | 30-2      | SAHA             | >45                        | Normal                                                                  | Transferred   |
| 24            | 30-3      | SAHA             | 0                          | Macroglossia and contracted tendons on all four legs                    | Euthanized    |

Piglets that had a normal health status became part of other xenotransplantation projects and were transferred out of MU facilities.

SCNT, somatic cell nuclear transfer; HDACi, histone deacetylase inhibitor; SAHA, suberoylanilide hydroxamic acid; ISAHA, 4-iodo-suberoylanilide hydroxamic acid.
