# Supplementary material
Source: PubMed Central journal article supplement (PMC4529055)
Supplement: Supp_Table2.pdf [file Supp_Table2.pdf]

SUPPLEMENTARY TABLE S2. QUALITY CONTROL STATISTICS FOR DEEP SEQUENCING

| Treatment-biological replicate | Bar code | Raw reads | Trimmed reads | Reads that passed filter | Adaptor trimmed reads | No. of clusters after elimination of contaminants | Percentage of clusters to be aligned to custom database | Percentage of reads with one mismatch (index) | Percentage of reads with $\geq Q30$ bases (PF) | No. of clusters that aligned to custom database | Percentage of reads that aligned to custom database | Normalization factor |
|--------------------------------|----------|-----------|---------------|--------------------------|-----------------------|---------------------------------------------------|---------------------------------------------------------|-----------------------------------------------|------------------------------------------------|-------------------------------------------------|-----------------------------------------------------|----------------------|
| IVV-1                          | CGATGT   | 32598850  | 30613650      | 29535544                 | 27341339              | 21027029                                          | 64.5                                                    | 1.4                                           | 88.1                                           | 11991977                                        | 57.0                                                | 1.2                  |
| IVV-2                          | AGTCAA   | 29793359  | 28438737      | 27802444                 | 26551191              | 18436162                                          | 61.9                                                    | 1.5                                           | 92.0                                           | 10603224                                        | 57.5                                                | 1.2                  |
| IVV-3                          | CGATGT   | 26876728  | 25550604      | 24823970                 | 23217360              | 16613297                                          | 61.8                                                    | 1.4                                           | 89.6                                           | 10442662                                        | 62.9                                                | 1.2                  |
| IVV-4                          | AGTCAA   | 17134304  | 15808972      | 15414436                 | 10349527              | 6707522                                           | 39.1                                                    | 1.9                                           | 85.9                                           | 2303454                                         | 34.3                                                | 5.5                  |
| IVF-1                          | TGACCA   | 26824559  | 24950288      | 23977905                 | 21015672              | 15408959                                          | 57.4                                                    | 2.0                                           | 86.4                                           | 9327788                                         | 60.5                                                | 1.5                  |
| IVF-2                          | AGTTCC   | 27779013  | 26357327      | 25704109                 | 23477196              | 16188889                                          | 58.3                                                    | 1.7                                           | 90.7                                           | 9541494                                         | 58.9                                                | 1.4                  |
| IVF-3                          | TGACCA   | 21881741  | 20647163      | 20001561                 | 17881148              | 14447337                                          | 66                                                      | 2.0                                           | 88.6                                           | 8539187                                         | 59.1                                                | 1.5                  |
| IVF-4                          | AGTTCC   | 19149595  | 18340695      | 17985493                 | 14808331              | 10902272                                          | 56.9                                                    | 1.7                                           | 89.6                                           | 5385298                                         | 49.4                                                | 2.3                  |
| SCNT (No HDACi)-1              | ACAGTG   | 31228786  | 29422831      | 28452531                 | 27712154              | 18690616                                          | 59.9                                                    | 1.5                                           | 90.0                                           | 10720264                                        | 57.4                                                | 1.3                  |
| SCNT (No HDACi)-2              | ATGTCA   | 27645052  | 26109546      | 25419782                 | 22085706              | 15612588                                          | 56.5                                                    | 1.7                                           | 89.4                                           | 8627996                                         | 55.3                                                | 1.4                  |
| SCNT (No HDACi)-3              | ACAGTG   | 27009999  | 25641434      | 24933643                 | 24013750              | 18160023                                          | 67.2                                                    | 1.5                                           | 90.6                                           | 11206656                                        | 61.7                                                | 1.2                  |
| SCNT (No HDACi)-4              | ATGTCA   | 19227656  | 18405364      | 18061551                 | 16023185              | 10570827                                          | 55                                                      | 1.6                                           | 91.6                                           | 5644160                                         | 53.4                                                | 2.2                  |
| SCNT-ISAHA-1                   | GCCAAAT  | 29552589  | 27667301      | 26717420                 | 26231546              | 19940709                                          | 67.5                                                    | 1.9                                           | 90.0                                           | 4282252                                         | 21.5                                                | 2.1                  |
| SCNT-ISAHA-2                   | CCGTCC   | 23064651  | 21811592      | 21243715                 | 20040497              | 14995986                                          | 65                                                      | 1.8                                           | 90.6                                           | 9256350                                         | 61.7                                                | 1.4                  |
| SCNT-ISAHA-3                   | GCCAAAT  | 31525066  | 29722167      | 28852724                 | 28460363              | 23110278                                          | 73.3                                                    | 1.9                                           | 91.1                                           | 10657692                                        | 46.1                                                | 1.3                  |
| SCNT-ISAHA-4                   | CCGTCC   | 23662743  | 22591062      | 22155107                 | 21017262              | 15228220                                          | 64.4                                                    | 1.7                                           | 92.9                                           | 5983358                                         | 39.3                                                | 2.3                  |
| SCNT(SAHA)-1                   | CAGATC   | 34301495  | 32204211      | 31117401                 | 30416697              | 23065124                                          | 67.2                                                    | 1.8                                           | 90.0                                           | 11872741                                        | 51.5                                                | 1.2                  |
| SCNT(SAHA)-2                   | GTCCGC   | 31786929  | 30154944      | 29428549                 | 28470037              | 20087884                                          | 63.2                                                    | 3.8                                           | 91.8                                           | 12554050                                        | 62.5                                                | 1.0                  |
| SCNT(SAHA)-3                   | CAGATC   | 26290456  | 24897741      | 24195499                 | 23452477              | 19110436                                          | 72.7                                                    | 1.7                                           | 90.8                                           | 12892505                                        | 67.5                                                | 1.1                  |
| SCNT(SAHA)-4                   | GTCCGC   | 15967702  | 15115938      | 14774401                 | 10985400              | 7911761                                           | 49.5                                                    | 3.5                                           | 87.5                                           | 4048854                                         | 51.2                                                | 3.3                  |
| SCNT(SCRIPTAID)-1              | CTTGTA   | 30620935  | 28687613      | 27623144                 | 24578740              | 18747904                                          | 61.2                                                    | 1.2                                           | 87.8                                           | 7153506                                         | 38.2                                                | 2.1                  |
| SCNT(SCRIPTAID)-3              | CTTGTA   | 31549878  | 29882255      | 29037432                 | 27698666              | 21302383                                          | 67.5                                                    | 1.1                                           | 90.4                                           | 13159596                                        | 61.8                                                | 1.0                  |
| SCNT(SCRIPTAID)-4              | GTGAAA   | 24622616  | 23154793      | 22705450                 | 21844300              | 14243636                                          | 57.8                                                    | 1.2                                           | 93.3                                           | 7732349                                         | 54.3                                                | 1.8                  |

IVV, *in vivo* blastocyst stage; IVF, *in vitro* fertilization; SCNT, somatic cell nuclear transfer; HDACi, histone deacetylase inhibitor; ISAHA, 4-iodo-suberoylamide hydroxamic acid; SAHA, suberoylamide hydroxamic acid.
